# Supplementary material for: Designing g-C 3 N 4 /PVP@Ca(OH) 2 ternary heterostructure catalysts for efficient degradation of dyes, antibacterial activity, and molecular docking analysis
Source: Royal Society of Chemistry journal article supplement (doi:10.1039/d5ra03570h), 2025-01-01
Supplement: d5ra03570h1.pdf [file d5ra03570h1.pdf]

**Designing g-C<sub>3</sub>N<sub>4</sub>/PVP@Ca(OH)<sub>2</sub> ternary heterostructure catalysts for efficient degradation of dyes, antibacterial activity, and molecular docking analysis**

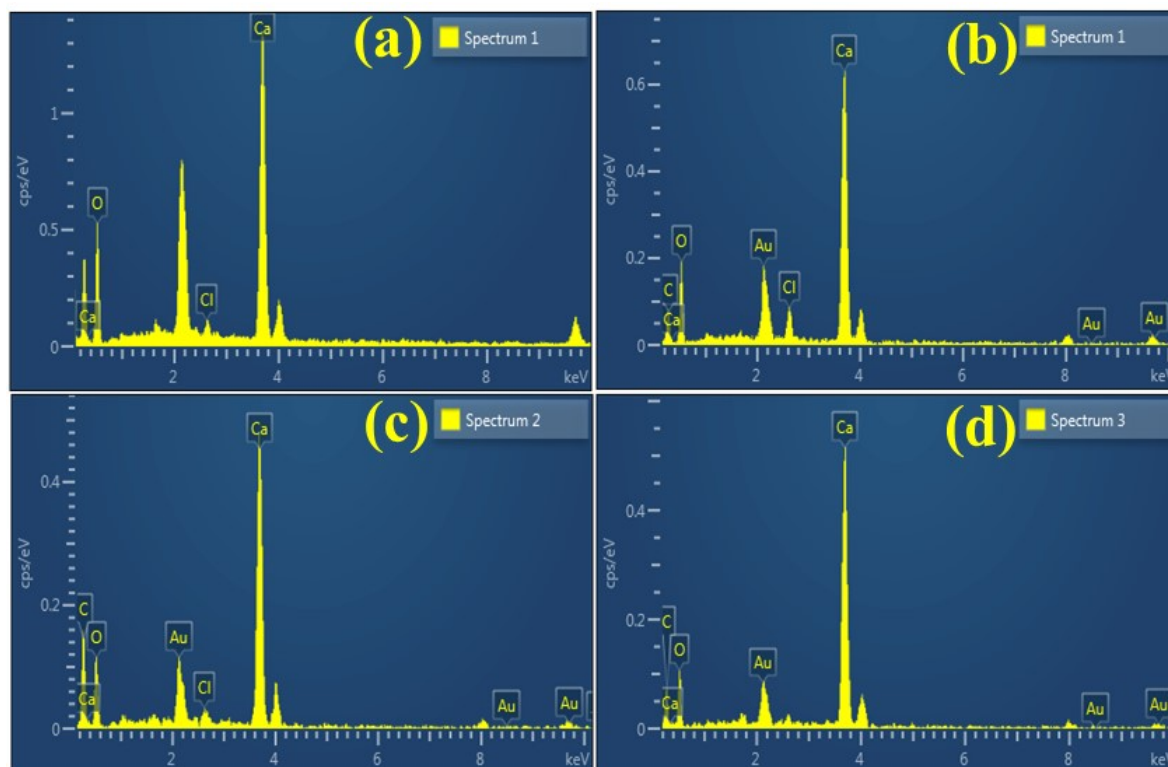

Fig. S1 (a-d) EDS of (a) Ca(OH)<sub>2</sub>, (b) PVP-Ca(OH)<sub>2</sub>, (c) 3% g-C<sub>3</sub>N<sub>4</sub>/PVP-Ca(OH)<sub>2</sub>, and (d) 6 % g-C<sub>3</sub>N<sub>4</sub>/PVP-Ca(OH)<sub>2</sub>

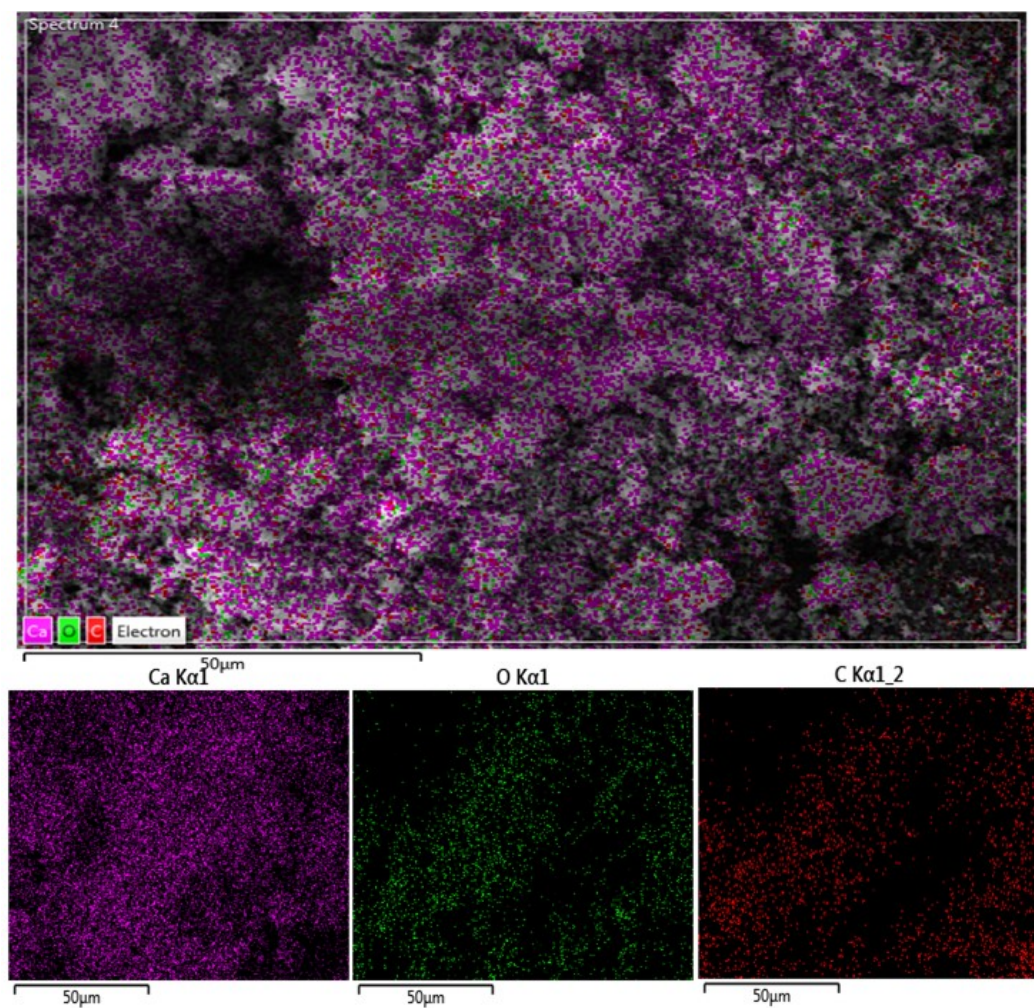

Fig. S2 (a-d) EDS mapping of 6 % g-C<sub>3</sub>N<sub>4</sub>/PVP-Ca(OH)<sub>2</sub>

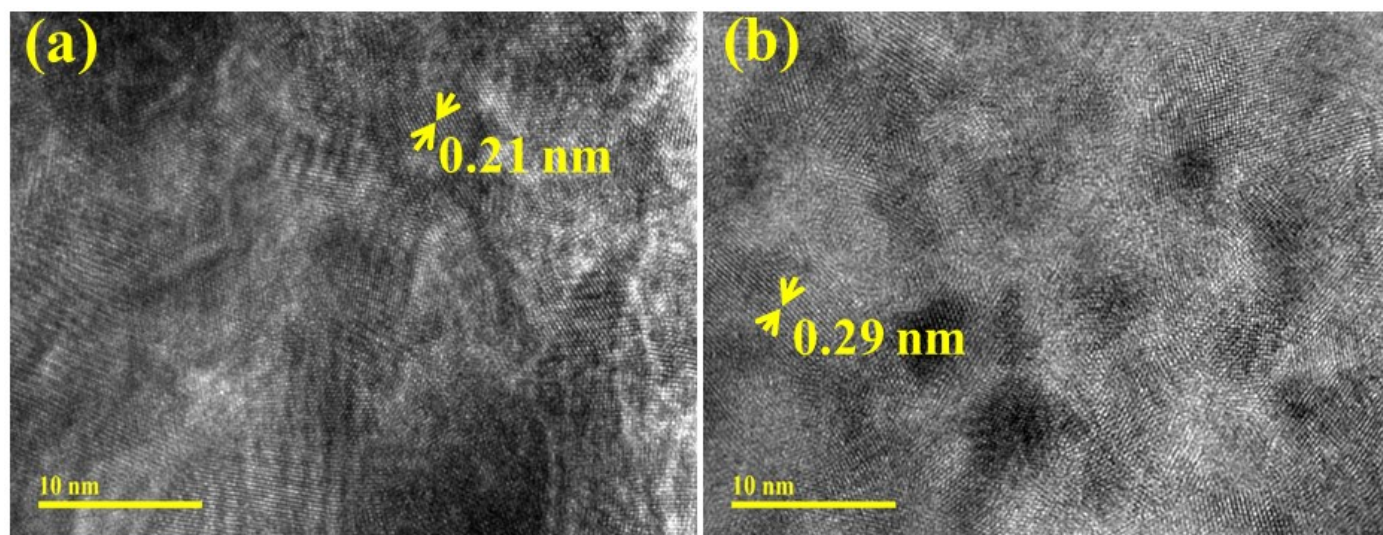

Fig. S3 (a-b) HRTEM images of (a)  $\text{Ca(OH)}_2$  and (b) 6 %  $\text{g-C}_3\text{N}_4/\text{PVP-Ca(OH)}_2$

Table S1: BET surface area of  $\text{Ca(OH)}_2$  and 6 %  $\text{g-C}_3\text{N}_4/\text{PVP-Ca(OH)}_2$

| Samples                                          | Correlation Coefficient | BET surface area<br>( $\text{m}^2/\text{g}$ ) |
|--------------------------------------------------|-------------------------|-----------------------------------------------|
| $\text{Ca(OH)}_2$                                | 0.9837618               | 2.1130<br>$\pm$<br>0.2757                     |
| 6 % $\text{g-C}_3\text{N}_4/\text{PVP-Ca(OH)}_2$ | 0.9941017               | 2.7305<br>$\pm$<br>0.2074                     |

$\text{g-C}_3\text{N}_4$  doped  $\text{Ca(OH)}_2$  showed 90.1% degradation of RhB after 10 minutes (Figure S4)

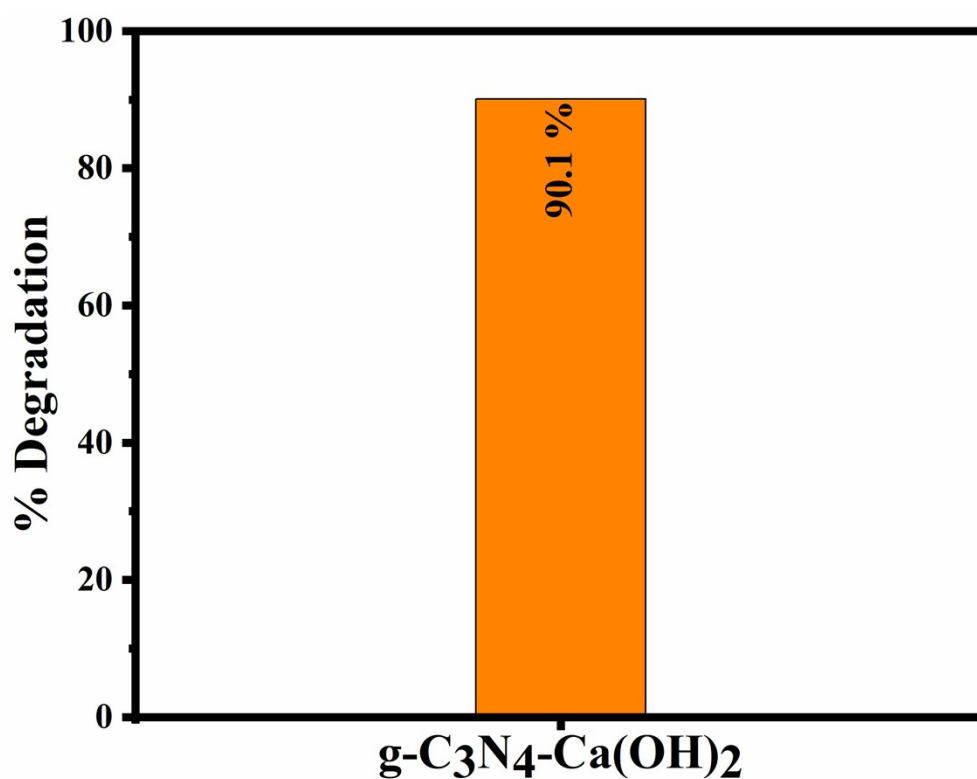

Figure S4: Catalytic activity of  $\text{g-C}_3\text{N}_4\text{-Ca(OH)}_2$

Table S2: Comparison of catalytic activity of present work with literature

| Catalysts                                                                         | Synthesis process          | Dye         | % degradation   | References   |
|-----------------------------------------------------------------------------------|----------------------------|-------------|-----------------|--------------|
| 6% g-C <sub>3</sub> N <sub>4</sub> /carbon spheres-Bi <sub>2</sub> O <sub>3</sub> | Co-precipitation           | RhB         | 95.69 (dark)    | [1]          |
| Carbon dots/chitosan-La <sub>2</sub> O <sub>3</sub>                               | Co-precipitation           | RhB         | 94.57 (in dark) | [2]          |
| N/Fe-TiO <sub>2</sub>                                                             | Precipitation-hydrothermal | RhB         | 75 (in light)   | [3]          |
| Ag-ZnO                                                                            | Refluxed chemical method   | rose bengal | 96 (in light)   | [4]          |
| Ag/g-C <sub>3</sub> N <sub>4</sub>                                                | Biogenic approach          | RhB         | 89 (in light)   | [5]          |
| 6% g-C <sub>3</sub> N <sub>4</sub> /PVP-Ca(OH) <sub>2</sub>                       | Co-precipitation           | RhB         | 96.4 (in dark)  | Present work |

Table S3: Comparison of antibacterial activity of present work with literature

| Catalysts                                                                         | Synthesis process | Bacteria         | Inhibition zone (mm) | References   |
|-----------------------------------------------------------------------------------|-------------------|------------------|----------------------|--------------|
| 6% g-C <sub>3</sub> N <sub>4</sub> /carbon spheres-Bi <sub>2</sub> O <sub>3</sub> | Co-precipitation  | <i>E. coli</i>   | 2.85                 | [1]          |
| Carbon dots/chitosan-La <sub>2</sub> O <sub>3</sub>                               | Co-precipitation  | <i>E. coli</i>   | 4.15                 | [2]          |
| g-C <sub>3</sub> N <sub>4</sub> / eudragit-CdTe                                   | Co-precipitation  | <i>S. aureus</i> | 9.35                 | [6]          |
| g-C <sub>3</sub> N <sub>4</sub>                                                   | -                 | <i>S. aureus</i> | 7                    | [7]          |
| 6% g-C <sub>3</sub> N <sub>4</sub> /PVP-Ca(OH) <sub>2</sub>                       | Co-precipitation  | <i>E. coli</i>   | 9.65                 | Present work |

## References

- [1] Ikram, Muhammad, Muhammad Shazaib, Ali Haider, Anum Shahzadi, Shair Baz, Mohammed M. Algaradah, Anwar Ul-Hamid, Walid Nabgan, Hisham SM Abd-Rabboh, and Salamat Ali. "Catalytic evaluation and in vitro bacterial inactivation of graphitic carbon nitride/carbon sphere doped bismuth oxide quantum dots with evidential in silico analysis." *RSC advances* 13, no. 36 (2023): 25305-25315.
- [2] Rasool, Sumaira, Muhammad Imran, Ali Haider, Anum Shahzadi, Walid Nabgan, Iram Shahzadi, Francisco Medina et al. "Efficient dye degradation and antibacterial activity of carbon

dots/chitosan-doped La<sub>2</sub>O<sub>3</sub> nanorods: in silico molecular docking analysis." *Acs Omega* 8, no. 28 (2023): 25401-25409.

[3]. Cong, Ye, Jinlong Zhang, Feng Chen, Masakazu Anpo, and Dannong He. "Preparation, photocatalytic activity, and mechanism of nano-TiO<sub>2</sub> co-doped with nitrogen and iron (III)." *The Journal of Physical Chemistry C* 111, no. 28 (2007): 10618-10623.

[4]. Wagh, Snehal S., Vishal S. Kadam, Chaitali V. Jagtap, Dipak B. Salunkhe, Rajendra S. Patil, Habib M. Pathan, and Shashikant P. Patole. "Comparative studies on synthesis, characterization and photocatalytic activity of Ag doped ZnO nanoparticles." *ACS omega* 8, no. 8 (2023): 7779-7790.

[5]. Khan, Mohammad Ehtisham, Thi Hiep Han, Mohammad Mansoob Khan, Md Rezaul Karim, and Moo Hwan Cho. "Environmentally sustainable fabrication of Ag@ g-C<sub>3</sub>N<sub>4</sub> nanostructures and their multifunctional efficacy as antibacterial agents and photocatalysts." *ACS Applied Nano Materials* 1, no. 6 (2018): 2912-2922.

[6]. Aslam, Asma, Muhammad Ikram, Ali Haider, Iram Shahzadi, Anwar Ul-Hamid, Ghafar Ali, Hameed Ullah et al. "Antibacterial potential and dye decolorization with graphitic carbon nitride and eudragit doped CdTe nanostructures evidential molecular docking analysis." *Journal of Photochemistry and Photobiology A: Chemistry* 454 (2024): 115738.

[7]. Sher, Mudassar, Mohsin Javed, Sammia Shahid, Shahid Iqbal, Muhammad Azam Qamar, Ali Bahadur, and Muhammad Abdul Qayyum. "The controlled synthesis of gC<sub>3</sub>N<sub>4</sub>/Cd-doped ZnO nanocomposites as potential photocatalysts for the disinfection and degradation of organic pollutants under visible light irradiation." *RSC advances* 11, no. 4 (2021): 2025-2039.
